# Extraverted Children Are More Biased by Bowl Sizes than Introverts

Koert van Ittersum<sup>1</sup>, Brian Wansink<sup>2\*</sup>

**1** Department of Marketing, University of Groningen, Groningen, The Netherlands, **2** Charles H. Dyson School of Applied Economics and Management, Cornell University, Ithaca, New York, United States of America

## Abstract

Extraverted children are hypothesized to be most at risk for over-serving and overeating due to environmental cues – such as the size of dinnerware. A within-subject field study of elementary school students found that extraverted children served themselves 33.1% more cereal in larger bowls (16-oz) than in smaller (12-oz) bowls, whereas introverted children were unaffected by bowl size (+5.6%, ns). However, when children were asked by adults how much cereal they wanted to eat, both extraverted and introverted children requested more cereal when given a large versus small bowl. Insofar as extraverted children appear to be more biased by environmental cues, this pilot study suggests different serving styles are recommended for parents and other caregivers. They should serve extraverts, but allow introverts to serve themselves. Still, since the average child still served 23.2% more when serving themselves than when served by an adult, it might be best for caregivers to do the serving whenever possible – especially for extraverted children.

**Citation:** van Ittersum K, Wansink B (2013) Extraverted Children Are More Biased by Bowl Sizes than Introverts. PLoS ONE 8(10): e78224. doi:10.1371/journal.pone.0078224

**Editor:** Antonio Verdejo García, University of Granada, Spain

**Received:** March 13, 2013; **Accepted:** August 14, 2013; **Published:** October 30, 2013

**Copyright:** © 2013 van Ittersum, Wansink. This is an open-access article distributed under the terms of the Creative Commons Attribution License, which permits unrestricted use, distribution, and reproduction in any medium, provided the original author and source are credited.

**Funding:** The authors have no support or funding to report.

**Competing Interests:** Brian Wansink received funding during the analysis stage of “Happier Meals: New Children’s Meals Lead to Fewer Purchased Calories” from September 2012 through December 2012. Brian Wansink became a member of the McDonald’s Advisory Council in January 2012. He received royalties from the Bantam Dell book, *Mindless Eating*. He was part of the Blue Zones Keynote & Panel Project in Los Angeles; gave paid lectures on food psychology research conducted over the past 20 years. PKF Consulting: Brian Wansink acted as paid consultant on a project that PKF conducted for the Department of Defense related to improving overall health of military bases. Unilever: He gave paid lectures on food psychology research conducted over the past 20 years. In regards to the *Mindless Products* and *Mindless Method* mentioned in PLOS ONE’s email to the authors, Dr. Wansink is not affiliated with either. Both projects were private ventures based upon Dr. Wansink’s prior studies, but he is not connected to them and receives no royalties or payment.

\* E-mail: foodandbrandlab@cornell.edu

## Introduction

As the size of dinnerware increases, so do self-servings and consumption of food by adults [1,2]. Yet, while this happens with adults, it is not known whether the same visual bias influences children and if it influences some more extremely than others [3,4]. With increasing concerns about childhood obesity, knowing what types of children are most at risk of being influenced by such external cues could sharpen the focus of caregiver interventions [5,6].

One characteristic that has shown to be correlated with overconsumption and obesity in adults is extraversion [7–11]. Behavioral differences between extraverted and introverted individuals have been attributed to differences in the self-regulation of arousal [12–14]. Introverts typically show higher levels of cortical arousal than extraverts, as a result of which introverts seek a reduction of their arousal levels [14], whereas extraverts may additionally increase their arousal through food consumption [15].

There is supporting evidence that extraverted children might also be more influenced by these external cues than introverts. First, extraverted children tend to exhibit lower self-consciousness [16] and have an external processing style, while introverted children have an internal processing style that involves reflection and consideration [17]. Furthermore, extraverts exhibit faster movement times than introverts (possibly because of differences in motor processes) [18]. This may suggest that introverts are more

cautious in their actions, which reduces the self-serving of food. Since introverts are more self-conscious, have internal processing styles that make them less susceptible to environmental cues, are more likely to rely on internal standards such as food portions, and are more cautious in their behavioral actions, we hypothesize that when they serve themselves, the serving size of introverted children is less influenced by dinnerware size than it is for extraverted children.

However, a different dynamic might occur when parents or caregivers are serving food to children – which often happens for children under the age of 12 [19]. Although introverted children may have more internal control when serving their own food, this may change in the presence of others [20,21]. For instance, when a second person becomes more involved, task performance of introverts has been shown to reduce significantly [22]. This is thought to be because the presence of this second person may lead the introvert to give up or relinquish their control of the situation [15]. Furthermore, introversion is strongly associated with behavioral and mental disengagement – that is, they are more likely to give up on the attempt to attain the goal with which a stressor is interfering [23]. In the context of serving food, we propose that when food is being served by a parent or adult, the difference in the amount of food requested by introverted and extraverted children becomes less dramatic [24].

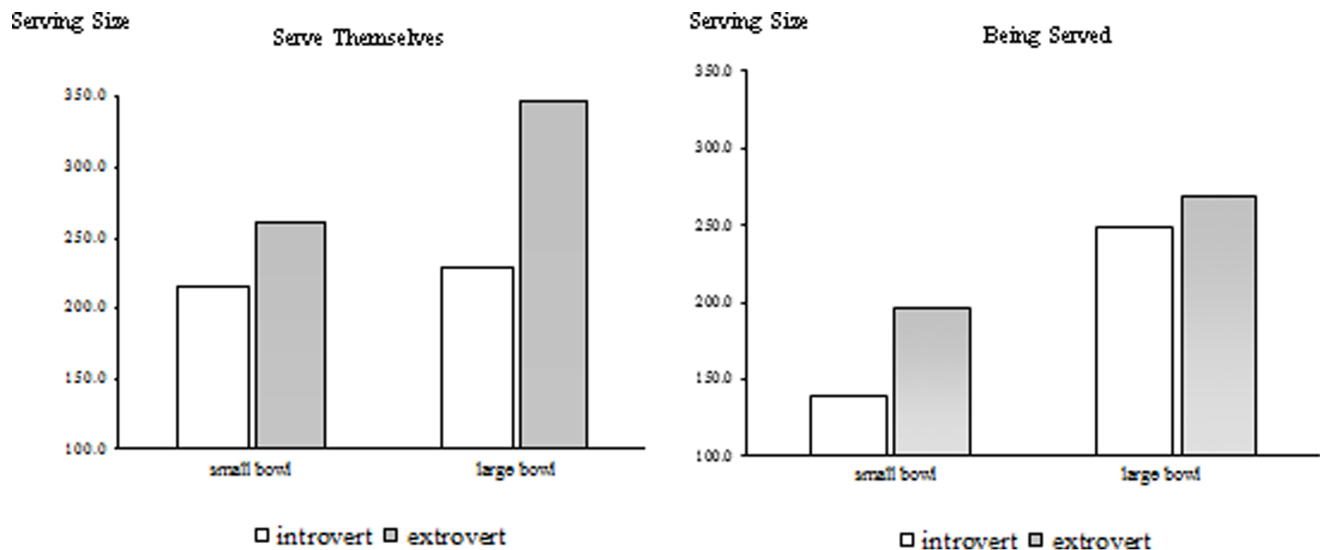

**Figure 1. Extraverted Children Tend to Overserve Themselves.**  
doi:10.1371/journal.pone.0078224.g001

## Methods

To examine the impact of extraversion on serving behavior, we conducted a within-subject study involving 18 elementary school children (66.7% female). This study was approved by the Cornell University Institutional Review Board, and parents or guardians provided written consent for their children to participate in this study. The average age of the children was 8.3 (age range 6–12). The study took place during four subsequent breakfasts. During two of the days, a server affiliated with the school cafeteria served the children in either a larger (16-oz) versus a smaller (12-oz) bowl. Children were asked to indicate how much cereal and milk they wanted. During the other two days children served themselves. Hidden scales embedded in the table with remote sensors measured how much cereal and milk each child served themselves or was served. How much they consumed was determined by subtracting the amount of cereal and milk that remained at the end of breakfast.

To measure the extraversion of each child, four attending teachers and counselors were simply asked to rate each child on the degree to which they were “extraverted” and again on the degree to which they were “introverted” (1 = strongly disagree; 9 = strongly agree). The names of the children were listed in two different orders to reduce the risk of order bias. One counselor and one teacher rated each child’s extraversion in a list that was presented in alphabetical order and the second counselor and the second teacher rated them in a list that was presented in reverse alphabetical order. After reverse scaling the introversion scores, the average of the extraversion and introversion scores was calculated across the four teachers and counselors (Cronbach’s  $\alpha = .87$ ). The average of these scores was used to classify the children as either a relative “extravert” or a relative “introvert” based on a median-split.

To examine the external validity of both scores, we conducted a series of correlation analyses (involving other personality traits collected during the study) and consistent with literature (e.g., [20,25]) find that the extraversion positively correlated with outgoing ( $r = .88$ ,  $p < .01$ ), adventurous ( $r = .69$ ,  $p < .01$ ), energetic ( $r = .77$ ,  $p < .01$ ), impulsive ( $r = .67$ ,  $p < .01$ ), and negatively correlated with obedient ( $r = -.33$ ,  $p < .10$ ), cautious ( $r = -.57$ ,  $p < .01$ ),

and concentrated ( $r = -.33$ ,  $p < .10$ ). We also examined the hypotheses based on the averages using OLS regression analyses. As our conclusions do not change, we present the dummy-variable results for readability purposes. Examining this variable as binary aids in the reporting of results and the ability to clearly illustrate them in a figure. A power analysis indicated a power of 0.92 for detecting an effect size of 0.50 at the 5% confidence level with a sample of 15.

## Results

Analysis of variance revealed that relatively extraverted children served and consumed 28.9% more grams of cereal than their introverted classmates (268.49 vs. 208.29;  $F(1,14) = 4.88$ ,  $p = .04$ ). Additionally, when all children served themselves, they served and consumed 23.2% more than when an adult served them (263.18 vs. 213.60;  $F(1,14) = 3.40$ ,  $p = .09$ ).

A significant three-way interaction between bowl size, extraversion, and server ( $F(1,14) = 5.76$ ,  $p = .02$ ) tentatively suggests that the effect of bowl size on serving size may be moderated by extraversion and the server. First, consistent with expectations, introverted children were less sensitive to the size of the bowl than extraverted children when they serve themselves ( $F(1,14) = 4.65$ ,  $p = .05$ ). While the introverted children served an insignificant 5.6% more in the larger than the smaller bowl (216.59 vs. 228.67;  $t(8) = .67$ ,  $p > .10$ ), the extraverted children served a significant 33.1% more in the larger than the smaller bowl (260.65 vs. 346.82;  $t(8) = 2.55$ ,  $p = .03$ ).

When an adult became involved, however, these biases changed, as indicated in Figure 1. When an adult served the cereal and milk, introverted children became more sensitive to the size of the bowl than extraverted children. Although the interaction was not significant ( $F(1,14) = 1.14$ ,  $p = .30$ ), introverted children ended up serving 79.5% more in the larger versus the smaller bowl (138.76 vs. 249.13;  $t(8) = 2.85$ ,  $p = .02$ ), which is substantially more than the 36.1% extra that extraverted children served in their large versus the small bowls (197.61 vs. 268.88;  $t(8) = 1.65$ ,  $p = .14$ ).

## General Discussion

Extraversion may be a critical personality characteristic when examining the susceptibility to environmental cues. When introverted children serve themselves they may be less influenced by environmental cues – such as bowl size – however this resolve disappears when served by a caregiver. In contrast, extraverted children seemingly benefit from having someone else serve their food for them.

Conducting this in a field study setting where children are eating their daily breakfast increases confidence that this relationship between extraversion and food intake is both relevant and robust [15]. While many personality studies have relatively large numbers of subjects for reliability, a pilot study showed the effect size for this intervention merited a smaller number of children who were repeatedly examined. Future research could examine whether this same impact happened with a more diverse population of children. In addition, there are a wide range of other factors that might influence the extent to which an extraverted person consumes more than an introvert. The mechanisms driving this may vary based on the anxiety of extraverts or the self-consciousness of introverts. One extension would be to observe if extraverts and introverts behave more similarly when eating alone.

## References

- Wansink B, van Ittersum K (2014) Portion size me: Plate size induced consumption norms and education futility. *J Exp Psychol Appl*: in process.
- Wansink B, van Ittersum K, Painter JE (2006) Ice cream illusions: bowls, spoons, and self served portion sizes. *Am J Prev Med* 31: 240–243.
- Van Ittersum K, Wansink B (2007) Do children really prefer large portions? Visual illusions bias their estimates and intake. *J Am Diet Assoc* 107: 1107–1110.
- Van Ittersum K, Wansink B (2012) Plate size and color suggestibility: The Delboeuf illusion's bias on serving and eating behavior. *J Consum Res* 39: 215–228.
- Wansink B (2004) Environmental factors that increase the food intake and consumption volume of unknowing consumers. *Annu Rev Nutr* 24: 455–479.
- Young L, Nestle M (2002) The contribution of expanding portion sizes to the US obesity epidemic. *Am J Public Health* 92: 246–249.
- Faith MS, Flint J, Fairburn CG, Goodwin GM, Allison DB (2001) Gender differences in the relationship between personality dimensions and relative body weight. *Obes Res* 9: 647–650.
- Hallstrom T, Noppa H (1981) Obesity in women in relation to mental illness, social factors and personality traits. *J Psychosom Res* 25: 75–82.
- Kakizaki M, Kuriyama S, Sato Y, Shimazu T, Matsuda-Ohmori K, et al. (2008) Personality and body mass index: A cross-sectional analysis from the miyagi cohort study. *J Psychosom Res* 64: 71–80.
- F, Rustin RM, De Backer G, Kornitzer M (1978) Psycho-socio-biological correlates of moderate overweight in an industrial population. *J Psychosom Res* 22: 145–158.
- Pierobon A, Giardini A, Fanfulla F, Callegari S, Majani G (2008) A multidimensional assessment of obese patients with obstructive sleep apnea syndrome (OSAS): A study of psychological, neuropsychological and clinical relationships in a disabling multifaceted disease. *Sleep Med* 9 (8): 882–889.
- Martsh CT, Miller WR (1997) Extraversion predicts heavy drinking in college students. *Pers Individ Dif* 23: 153–55.
- Eysenck HJ (1967) The biological basis for personality. New York: Transaction Publishers. 399 p.
- Eysenck HJ (1990) Biological dimensions of personality. In: Pervin LA, editor. *Handbook of personality: Theory and research*. New York: Guilford. 244–270.
- Herman CP, Koenin-Norbert S, Peterson JB, Polivy J (2005) Matching effects on eating: Do individual differences make a difference? *Appetite* 45: 108–9.
- Harrington R, Loffredo DA (2001) The relationship between life satisfaction, self-consciousness, and the Myers-Briggs type inventory dimensions. *J Psychol* 135: 439–50.
- Selby EC, Treffinger DJ, Isaksen SG, Lauer KJ (2004). Defining and assessing problem-solving style: Design and development of a new tool. *J Creat Behav* 38: 221–43.
- Doucet C, Stelmack RM (1997) Movement time differentiates extraverts from introverts. *Pers Individ Dif* 23: 775–86.
- Craeynest M, Crombez G, Koster EH, Haerens L, De Bourdeaudhuij I (2008) Cognitive-motivational determinants of fat food consumption in overweight and obese youngsters: The implicit association between fat food and arousal. *J Behav Ther Exp Psychiatry* 39: 354–68.
- Cuperman R, Ickes W (2009) Big five predictors of behavior and perceptions in initial dyadic interactions: Personality similarity helps extraverts and introverts, but hurts “disagreeables.” *J Pers Soc Psychol* 97: 667–684.
- Grant T, Dajee K (2003) Types of task, types of audience, types of actor: Interactions between mere presence and personality type in a simple mathematical task. *Pers Individ Dif* 35: 633–39.
- Graydon J, Murphy T (1995) The effect of personality on social facilitation whilst performing a sports related task. *Pers Individ Dif* 19: 265–67.
- Ferguson E (2001) Personality and coping traits: A joint factor analysis. *Br J Health Psychol* 6: 311–325.
- Golan M, Crow S (2004) Parents are key players in the prevention and treatment of weight related problems. *Nutr Rev* 62: 39–50.
- Gudjonsson GH, Sigurdsson JF, Bragason OO, Einarsson E, Valdimarsdottir EB (2004) Compliance and personality: The vulnerability of the unstable introvert. *Eur J Pers* 18: 435–443.

## Acknowledgments

The authors are grateful to Kelsey Gatto and Julia Hastings-Black for editorial assistance.

## Author Contributions

Conceived and designed the experiments: BW KV. Performed the experiments: BW KV. Analyzed the data: BW KV. Contributed reagents/materials/analysis tools: BW KV. Wrote the paper: KV.
